RESEARCH ARTICLE

# Study of the Ability of Bifidobacteria of Human Origin to Prevent and Treat Rotavirus Infection Using Colonic Cell and Mouse Models

Mélanie Gagnon<sup>1</sup>\*, Allison Vimont<sup>1</sup>\*, André Darveau<sup>2</sup>, Ismaïl Fliss<sup>1</sup>, Julie Jean<sup>1</sup>\*

**1** Institute of Nutrition and Functional Foods, Department of Food Science, Laval University, Quebec, Quebec, Canada, **2** Department of Biochemistry, Microbiology and Bioinformatics, Laval University, Quebec, Quebec, Canada

\* These authors contributed equally to this work.

\* [julie.jean@fsaa.ulaval.ca](mailto:julie.jean@fsaa.ulaval.ca)

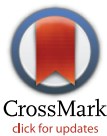

**OPEN ACCESS**

**Citation:** Gagnon M, Vimont A, Darveau A, Fliss I, Jean J (2016) Study of the Ability of Bifidobacteria of Human Origin to Prevent and Treat Rotavirus Infection Using Colonic Cell and Mouse Models. PLoS ONE 11(10): e0164512. doi:10.1371/journal.pone.0164512

**Editor:** Miren Iturriza-Gómara, University of Liverpool, UNITED KINGDOM

**Received:** April 15, 2016

**Accepted:** September 25, 2016

**Published:** October 11, 2016

**Copyright:** © 2016 Gagnon et al. This is an open access article distributed under the terms of the [Creative Commons Attribution License](https://creativecommons.org/licenses/by/4.0/), which permits unrestricted use, distribution, and reproduction in any medium, provided the original author and source are credited.

**Data Availability Statement:** All relevant data are within the paper and its Supporting Information files.

**Funding:** This work was supported by Fonds de Recherche du Québec - Nature et Technologies, FR068242, to Dr. Ismaïl Fliss, and Fonds de Recherche du Québec - Nature et Technologies, Scholarship B2, to Dr. Mélanie Gagnon. The funders had no role in study design, data collection and analysis, decision to publish, or preparation of the manuscript.

## Abstract

Rotavirus is the leading cause of severe acute gastroenteritis among children worldwide. Despite effective vaccines, inexpensive alternatives such as probiotics are needed. The aim of this study was to assess the ability of probiotic candidate *Bifidobacterium thermophilum* RBL67 to inhibit rotavirus infection. Bacterial adhesion to intestinal cells and interference with viral attachment were evaluated *in vitro*. *B. thermophilum* RBL67 displayed adhesion indexes of  $625 \pm 84$  and  $1958 \pm 318$  on Caco-2 and HT-29 cells respectively and was comparable or superior to four other bifidobacteria, including *B. longum* ATCC 15707 and *B. pseudolongum* ATCC 25526 strains. Incubation of *B. thermophilum* RBL67 for 30 min before (exclusion) and simultaneously (competition) with human rotavirus strain Wa decreased virus attachment by  $2.0 \pm 0.1$  and  $1.5 \pm 0.1 \log_{10}$  (by 99.0% and 96.8% respectively). Displacement of virus already present was negligible. In CD-1 suckling mice fed *B. thermophilum* RBL67 challenged with simian rotavirus SA-11, pre-infection feeding with RBL 67 was more effective than post-infection feeding, reducing the duration of diarrhea, limiting epithelial lesions, reducing viral replication in the intestine, accelerating recovery, and stimulating the humoral specific IgG and IgM response, without inducing any adverse effect. *B. thermophilum* RBL67 had little effect on intestinal IgA titer. These results suggest that humoral immunoglobulin might provide protection against the virus and that *B. thermophilum* RBL67 has potential as a probiotic able to inhibit rotavirus infection and ultimately reduce its spread.

## Introduction

Human rotavirus is the leading cause of severe dehydrating diarrhea in infants and young children worldwide, in both developed and developing countries. Peak incidence occurs in children

**Competing Interests:** The authors have declared that no competing interests exist.

2 years of age and under, with an estimated 0.3 rotavirus-induced gastroenteritis episode per child-year [1]. Between 1990 and 2011, rotavirus infection caused an estimated 197,000 deaths per year, or 23 per hour [2]. About 90% of these occurred in low-income countries in Africa and Asia and were associated with poor health care [3]. The virus is transmitted primarily via the fecal-oral route and to a lesser extent via vomit, spreading via contaminated food or water, direct person-to-person contact, aerosols, and environmental surfaces [4]. Infectious doses as low as one plaque-forming unit [5], viral loads as high as  $10^{12}$  particles per gram in feces and vomit [4] and persistence on fomites and hands [6, 7] all contribute to the high incidence of rotavirus illness. Since the spread of the virus is very difficult to control, rotavirus outbreaks occur often in crowded locations such as daycare centers, hospitals and schools [4]. Rotavirus infects primarily mature enterocytes in the intestinal epithelium, leading to malabsorption and osmotic diarrhea [8, 9].

Since no specific anti-rotavirus therapy is currently available, the main treatment is fluid replacement to prevent dehydration and zinc treatment to decrease the severity and duration of the diarrhea [3]. Two effective rotavirus vaccines, namely RotaTeq<sup>®</sup> (Merck and Co) and Rotarix<sup>®</sup> (GSK Biologicals), have been available since 2006 and are recommended by the World Health Organization for use in all countries, particularly in those where diarrhea-related mortality in children younger than 5 years is common [3]. The number of countries that have introduced rotavirus vaccines increased from 5 in 2011 to 35 in 2015 [10]. Both vaccines have been reported to be highly effective in high-income settings [11]. Nevertheless, the protection afforded by these live oral vaccines is reduced in low-income settings [12]. Consequently, inexpensive and effective supplementary or complementary therapies remain necessary.

The role of intestinal microbiota in modulating enteric viral infections has been highlighted by several recent studies [13, 14], in particular with norovirus [15] and rotavirus [16]. In this context, the use of probiotic strains as an alternative therapy has been proposed [17, 18]. Based on consultation with scientific experts, the World Health Organization in 2001 retained the following (and current) definition of probiotics: “live microorganisms that, when administered in adequate amounts, confer a health benefit on the host” [19]. General benefits associated with probiotics include support of a healthy gut microbiota, a healthy digestive tract and a healthy immune system [20]. More precisely, some probiotic strains have been shown to stimulate gut epithelial cell proliferation significantly, to reduce gut permeability and to enhance immune responses as well as providing other health benefits [21–23]. Decreased duration, severity or incidence of infantile diarrhea has been noted in some pediatric clinical trials in conjunction with rotavirus outbreaks. Several probiotic strains have been tested, including the Gram-positive strains of *Bifidobacterium animalis* subsp. *lactis* Bb12 [24], *Lactobacillus rhamnosus* GG [25, 26], *Lb. paracasei* [27], *B. bifidum*, *Streptococcus thermophilus* [28], and recently the Gram-negative *Escherichia coli* Nissle [29]. The beneficial effects of probiotics are thought to be bacterial species specific, although the precise mechanisms involved in these effects remain largely unknown [27, 30], thus calling for the use of *in vitro* and *in vivo* models.

The probiotic candidate *Bifidobacterium thermophilum* RBL67 used in this study was isolated previously from stool samples obtained from breast-fed infants during research conducted by our group [31, 32]. Such infants are known to be less affected by infections such as gastroenteritis [33]. The safety of bifidobacteria for use as probiotics is presumed on the basis of the long historical consumption of fermented milks and ever-growing knowledge on the taxonomy and physiology of the bacteria they contain [34, 35]. Moderately tolerant of oxygen and low pH [32], *B. thermophilum* RBL67 appears resistant to only one antibiotic (nalidixic acid), and is sensitive to nine antibiotics including ampicillin, tetracycline and chloramphenicol [36]. It reportedly produces a bacteriocin-like substance active against *Listeria* and *Salmonella* [31, 32, 37, 38] and protects epithelial integrity upon *Salmonella* challenge in the presence of

competing human microbiota [39]. Its strong anti-*Salmonella* activity has been demonstrated in an *in vitro* continuous fermentation system simulating the juvenile intestinal ecosystem, along with its ability to rebalance the metabolic activity of gut microbiota after antibiotic treatment [38]. Its genome has been sequenced [40] and is available for genetic studies.

The aim of the present study was to evaluate the adhesiveness of *B. thermophilum* RBL67 to Caco-2 and HT-29 cells as well as its ability to interfere with rotavirus attachment. An *in vivo* study using suckling mice was also performed to assess its host-protection properties under intestinal conditions and its impact on the course of rotavirus infection, including diarrhea, virus replication, colon histology and the immune response.

## Materials and Methods

### Bacterial strains

Three strains of *Bifidobacterium* from the Research Network on Lactic Acid Bacteria (RBL Network) were used in this study, namely *B. thermophilum* RBL67, *B. thermacidophilum* RBL69 and *B. thermacidophilum* RBL70, isolated from stool samples obtained from infants [31, 32] and preselected on the basis of resistance to gastrointestinal conditions. Two *Bifidobacterium* strains obtained from the American Type Culture Collection were used for comparison purposes: *B. longum* ATCC 15707 and *B. pseudolongum* ATCC 25526. All strains were cultured in MRS agar supplemented with 0.05% (wt/vol) L-cysteine-hydrochloride at 37°C under anaerobic conditions as described previously [41] and enumerated (in colony-forming units, cfu) on Beerens agar plates [42].

### Cell cultures

All cell lines were cultured in Gibco media (Invitrogen, Burlington, Ontario, Canada) at 37°C under a 5% CO<sub>2</sub> atmosphere. Caco-2 cells (ATCC HTB-37) were grown routinely in Dulbecco's Modified Eagle medium as described previously [41]. HT-29 cells (ATCC HTB-38) were grown routinely in RPMI 1640 medium supplemented with 10% fetal bovine serum (FBS), 2 mmol/L L-glutamine, 100 U/mL penicillin and 100 µg/mL streptomycin. Rhesus monkey kidney cell line MA-104 (ATCC CRL-2378.1) was routinely grown in Eagle's minimal essential medium supplemented with 10% FBS, 2 mmol/L L-glutamine, 1% nonessential amino acids, 1% HEPES buffer, 1.125 g/L sodium bicarbonate, 100 U/mL penicillin and 100 µg/mL streptomycin. For adhesion and inhibition assays, monolayers of human colon carcinoma cells (Caco-2 and HT-29) were seeded at a density of 10<sup>4</sup> cells per well in 24-well tissue culture plates (Falcon, Becton Dickinson and Co., Franklin Lakes, NJ). The culture medium was replaced every day, and the monolayer was used at post-confluence (10<sup>6</sup> cells/well) after 15 and 21 days for Caco-2 and HT-29 respectively. The medium was replaced with its antibiotic-free equivalent 18 h before performing the assays.

### Viruses

Human rotavirus strain Wa (ATCC VR-2018) and simian rotavirus strain SA-11 (ATCC VR-1565) used for *in vitro* and *in vivo* assays, respectively, were propagated in MA-104 cells as described previously [6] with some modifications. Briefly, confluent cell monolayers were infected at an MOI of 1.5 with rotavirus pre-activated with 16 µg/mL of porcine trypsin (Sigma Chemical Co., St. Louis, MO) for 30 min at room temperature. After adsorption (1 h at 37°C), maintenance medium (MEM + 2% FBS) was added and cells were incubated for 48 h at 37°C with 5% CO<sub>2</sub>. The infected cultures were then frozen (-80°C) and thawed (37°C) three times, the contents centrifuged at 1,000 x g for 10 min and the supernatant dispensed into vials for

storage at  $-80^{\circ}\text{C}$  until use. Infectious viruses were quantified using the following cell based methods. Strain Wa titer was determined from a cell culture immunofluorescence assay [43] and expressed in focus-forming units (ffu) per mL. The titer of simian rotavirus strain SA-11 was determined by plaque assay [44] with some modifications and expressed in plaque-forming units (pfu) per mL. Briefly, confluent MA-104 cells in 6-well plates were washed with phosphate-buffered saline (PBS) and infected with 100  $\mu\text{L}$  of pre-activated SA-11 at  $37^{\circ}\text{C}$  for 1 h in a 5%  $\text{CO}_2$  atmosphere. Monolayers were then overlaid with MEM supplemented with 4% FBS, 1.2% agarose type II (Sigma) and 6.5  $\mu\text{g}/\text{mL}$  trypsin. Plates were incubated for 3 days at  $37^{\circ}\text{C}$  (5%  $\text{CO}_2$ ), fixed in 3.7% (v/v) formaldehyde and then stained with 0.1% (w/v) aqueous crystal violet solution to reveal lytic plaques resulting from the cytopathic effect.

### *In vitro* adhesion of *Bifidobacterium* strains to Caco-2 and HT-29 cells

Cells monolayers were washed twice with sterile PBS, drained, contacted with 250  $\mu\text{L}$  of *Bifidobacterium* suspension ( $5 \times 10^9$  cfu/mL in PBS) per well, incubated for 60 min at  $37^{\circ}\text{C}$  under anaerobic conditions, then rinsed with PBS. Adherent bacteria were then collected in three washings of the monolayer with PBS after 15 min of trypsin-EDTA treatment at  $37^{\circ}\text{C}$  and enumerated by plating. Results are expressed as the adhesion index, which is the number of bacteria adhering per 100 cells.

### *In vitro* antagonism against rotavirus attachment to Caco-2 and HT-29 cells

Cell monolayers were washed twice with sterile PBS, drained, then contacted with 250  $\mu\text{L}$  of pre-activated human rotavirus strain Wa suspension ( $5 \times 10^6$  ffu/mL) per well for 30 min after (exclusion), simultaneously with (competition) or 30 min before (displacement) the addition of 250  $\mu\text{L}$  of *B. thermophilum* RBL67 suspension ( $5 \times 10^9$  cfu/mL) per well. Positive controls received PBS instead of *B. thermophilum* RBL67. Cells were then incubated for 90 min at  $37^{\circ}\text{C}$  under anaerobic conditions, rinsed with PBS, and attached virus was collected in three washings with PBS by repeated pipetting after 15 min of trypsin-EDTA treatment at  $37^{\circ}\text{C}$ . Attached virus was enumerated by cell culture immunofluorescence assay as described previously [43].

### Mice

Timed pregnant CD-1 mice obtained from Charles River (St-Constant, Québec, Canada) were fed a standard laboratory rodent chow (Charles River Laboratories, Wilmington, MA), provided with water ad libitum, and kept in an animal room maintained at  $22 \pm 2^{\circ}\text{C}$  with a 12 h light/dark cycle. Each dam and its litter were housed in a micro-isolator cage (Lab Products, Seaford, DE) on a cage ventilation rack (Lab Products) that provided a unidirectional flow of filtered air over the cage hoods. All dams were rotavirus antibody negative as measured by enzyme-linked immunosorbent assay (ELISA, described below). The experiments were performed with the approval of the animal care committee of Laval University “Comités de protection des animaux” (SIRUL number: 76543) and the mice were cared for and handled in conformity with the Canadian Guide for the Care and Use of Laboratory Animals [45]. No animal died during the study except for the euthanasia scheduled for the taking of biological samples.

### Suckling mice treatment groups

Three experimental repetitions were done using pups from the litters of fifteen dams (10–14 pups per litter, total  $n = 189$ ). Experiments were conducted on suckling mice because

preliminary assays shown that adults mice are highly resistant to rotavirus infection and required either antibiotic pretreatment or a genetically modified mice model. Dams and their litters were assigned randomly to one of the five experimental groups (Table 1). *B. thermophilum* RBL67 was given orally at a daily dose of  $1 \times 10^9$  cfu in 20  $\mu$ L of PBS for 7 consecutive days, from the age of 3 days or 9 days depending on the experimental group. On day 9, simian rotavirus strain SA-11 not trypsin-activated was given orally at a single dose of  $1 \times 10^4$  pfu in 20  $\mu$ L of PBS with 10% blue food coloring (McCormick Co., London, Ontario, Canada) added as a tracer instead of human rotavirus Wa which is noninfectious to mice. Control animals received 20  $\mu$ L of placebo (PBS with 10% blue food coloring). After each feeding and infection, the pups were returned to their mothers and allowed to suckle. Activity level, body weight and external signs of disease (diarrhea, dehydration) of mice were observed daily over the course of experiment. Mice were sacrificed under anesthesia by intraperitoneal injection of 0.01 mL/g of a ketamine/xylazine mixture (respectively 15 mg/mL and 1 mg/ml) for microbial and histological analysis and measurement of the immune response. All efforts were made to minimize animal suffering.

### Enumeration of intestinal bifidobacteria and rotavirus

The intestines were removed aseptically from the sacrificed mice, weighed, placed in 1.0 mL of PBS with 5% antibiotic solution (for viral counts) or 0.5 g/L L-cysteine (for bacterial counts) and homogenized with an Ultra-Turrax (Janke and Kunkel, Staufen, Germany) on ice for 15 s at 13,500 rpm. For viral quantification, the suspension was then centrifuged at 13,500 rpm for 5 min to remove debris and frozen at  $-20^{\circ}\text{C}$  until plaque assay. For bacterial quantification, the suspension was diluted immediately, plated on Beerens selective agar and incubated at  $37^{\circ}\text{C}$  for 72 h under anaerobic conditions. Isolates were then confirmed by Gram staining to be Gram-positive rods and identified using API 50CH galleries (BioMérieux, Montréal, Québec, Canada) according to the manufacturer's instructions.

### Histological analysis of the colon

Sections of colon were fixed in PBS containing 4% (w/v) paraformaldehyde (TAAB, Callera Park, Aldermaston Berks, England), embedded in paraffin, cut into 5  $\mu$ m slices using a microtome (Model 2040, Reichert-Jung, Vienna, Austria) and stained with hematoxylin and eosin. A pathologist kept unaware of sample origin then examined the epithelium morphology using a light microscope (Leica Microsystems, Richmond Hill, Ontario, Canada). Images were acquired by a Hyper HAD camera (Sony Ltd., Willowdale, Ontario, Canada) and Image Matrox Inspector software 3.1 (Matrox Electronic Systems Ltd., Dorval, Québec, Canada).

**Table 1. Distribution of experimental groups in the *in vivo* assay.**

| Group | <i>B. thermophilum</i> RBL67 |                        | Simian rotavirus strain SA-11 |
|-------|------------------------------|------------------------|-------------------------------|
|       | Feeding period (days)        | Daily dose (cfu/mouse) | Inoculum on day 9 (pfu/mouse) |
| A     | -                            | -                      | Control treatment             |
| B     | 3–9                          | $10^9$                 | Control treatment             |
| C     | -                            | -                      | $10^4$                        |
| D     | 3–9                          | $10^9$                 | $10^4$                        |
| E     | 9–15                         | $10^9$                 | $10^4$                        |

doi:10.1371/journal.pone.0164512.t001

## Quantification of the immune response in intestinal and serum samples by ELISA

The level of intestinal rotavirus-specific IgA was determined by ELISA as described previously [46, 47] with some modifications. Briefly, simian rotavirus strain SA-11 was fixed in a 96-well plate ( $8 \times 10^5$  pfu/mL in 2% formaldehyde-PBS solution). Diluted intestinal homogenate (500 mg/mL) was added, followed by peroxidase-labeled goat anti-mouse IgA and finally the O-phenylenediamine (OPD, Sigma) standard solution in the presence of  $H_2O_2$ . Optical density (OD) was measured at 450 nm on a Thermomax microplate reader (Molecular Devices, Opti-Resources, Charny, Québec, Canada). Rotavirus-specific IgG and IgM in serum obtained by centrifuging ( $4,000 \times g$  for 10 min at  $4^\circ C$ ) cardiac blood from individual mice were determined using the same protocol except that peroxidase-conjugated goat anti-mouse (H+L, Kirkegaard and Perry Laboratories) was used. Intestinal fluid and serum from non-infected mice not fed *Bifidobacterium* were used as negative controls on each plate. Titers were calculated as  $\log_{10}(1/Dc)$  where the cut-off dilution (Dc) was the dilution yielding twice the absorbance of the negative controls.

## Statistical analyses

Adhesion indexes of *Bifidobacterium* strains and attachment of human rotavirus strain Wa to intestinal cells were compared among treatments using the one-way analysis of variance (ANOVA) general linear model followed by Tukey's HSD test. Body weight, simian rotavirus strain SA-11 titer, intestinal *B. thermophilum* RBL67 count and immunoglobulin concentration were compared among treatment groups using the one-way ANOVA general linear model followed by the Hsu-Dunnett test. Statistical significance was declared at  $P < 0.05$ . All statistical analyses were performed using JMP<sup>®</sup> software version 10.0 (SAS Institute Inc, Cary, NC).

## Results

### *B. thermophilum* RBL67 displayed high adhesion ability to intestinal cells

The ability of *B. thermophilum* RBL67 to adhere to Caco-2 and HT-29 cells was compared with that of four other *Bifidobacterium* strains including two *B. thermacidophilum* strains isolated from infant stool samples (RBL69 and RBL70) and two reference strains, namely *B. longum* ATCC 15707 and *B. pseudolongum* ATCC 25526 (Fig 1), recognized for their weak and strong adhesion respectively [48]. The adhesion index of *B. thermophilum* RBL67 was evaluated at  $625 \pm 84$  and  $1958 \pm 318$  on Caco-2 and HT-29 respectively. Expressed per unit area, *B. thermophilum* RBL67 adhesion was  $3.3 \pm 0.4 \times 10^4$  cfu/mm<sup>2</sup> and  $1.0 \pm 0.2 \times 10^5$  cfu/mm<sup>2</sup> to Caco-2 and HT-29 respectively. No significant difference was noted between *B. thermophilum* RBL67, RBL69, RBL70 and *B. pseudolongum* ATCC 25526. As expected, *B. longum* ATCC 15707 showed significantly lower adhesion indexes of  $54 \pm 97$  and  $150 \pm 318$  respectively on Caco-2 and HT-29.

### *B. thermophilum* RBL67 decreased rotavirus attachment to intestinal cells *in vitro*

Inhibition of rotavirus attachment to intestinal cells by *B. thermophilum* RBL67 was evaluated using exclusion, competition and displacement assays (Fig 2). Preliminary 48-h trials indicated that the highest attachment to both intestinal cell lines was obtained after 1.5 h of contact time (S1 Fig). When rotavirus was added alone (positive control),  $5.8 \pm 0.1$  and  $5.7 \pm 0.1 \log_{10}$  were attached to Caco-2 and HT-29 cell lines respectively. However, when rotavirus was added 30

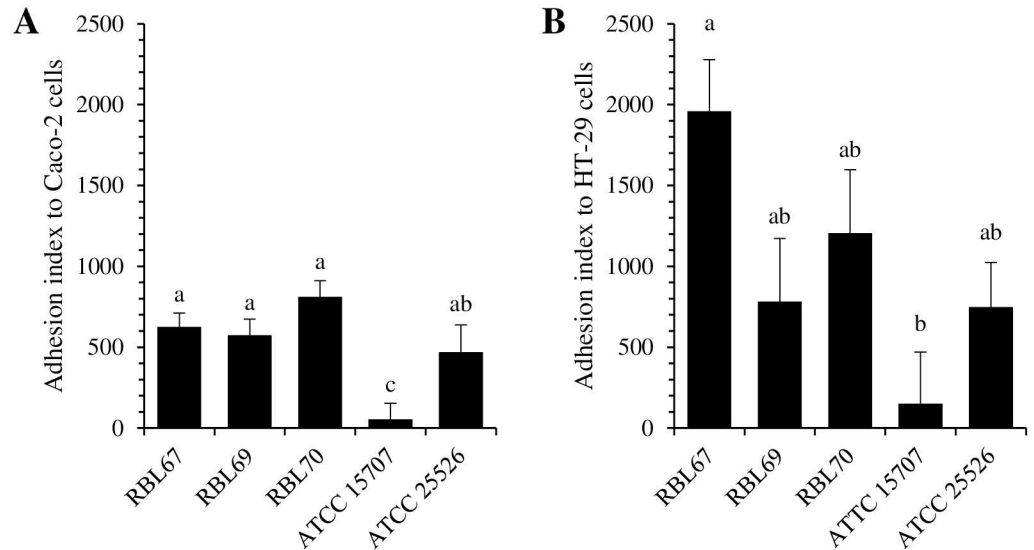

**Fig 1. Adhesion of *Bifidobacterium* strains RBL67 (*thermophilum*), RBL69 and RBL70 (*thermacidophilum*), ATCC 15707 (*longum*), and ATCC 25526 (*pseudolongum*) to cultured intestinal cell monolayers: (A) Caco-2, (B) HT-29.** Adherent bacteria were counted by plating after 1 h of contact. Index is the number per 100 intestinal cells. Error bars indicate the standard error of the mean. Different letters indicate significant difference between assays (Tukey's HSD test,  $P < 0.05$ ,  $n = 3$ ).

doi:10.1371/journal.pone.0164512.g001

min after the addition of *B. thermophilum* RBL67 (exclusion), the number of viruses attached dropped by two log cycles (to  $3.8 \pm 0.1$ ). No significant difference between cell lines was observed ( $P > 0.05$ ). In competition and displacement assays, rotavirus attachment was respectively  $4.3 \pm 0.1 \log_{10}$  and  $5.6 \pm 0.1 \log_{10}$ .

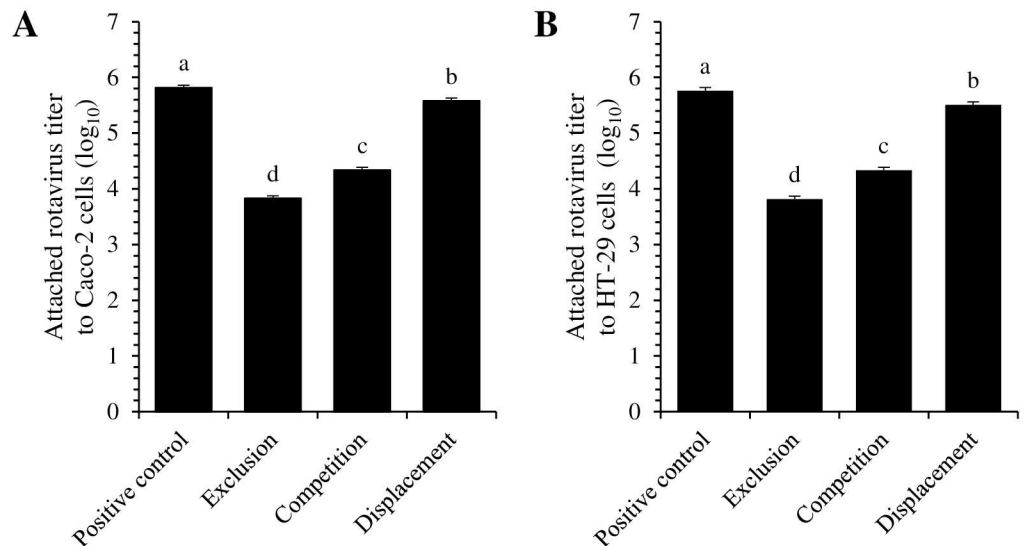

**Fig 2. Attachment of human rotavirus strain Wa to Caco-2 (A) and HT-29 (B) cells in exclusion, competition and displacement assays with *B. thermophilum* RBL67.** Positive controls were contacted with rotavirus only. Attached rotavirus titer was measured by immunofluorescence after 1.5 h of contact and expressed in focus-forming units per mm. Error bars indicate the standard error of the mean. Different letters indicate significant difference between assays (Tukey's HSD test,  $P < 0.05$ ,  $n = 3$ ).

doi:10.1371/journal.pone.0164512.g002

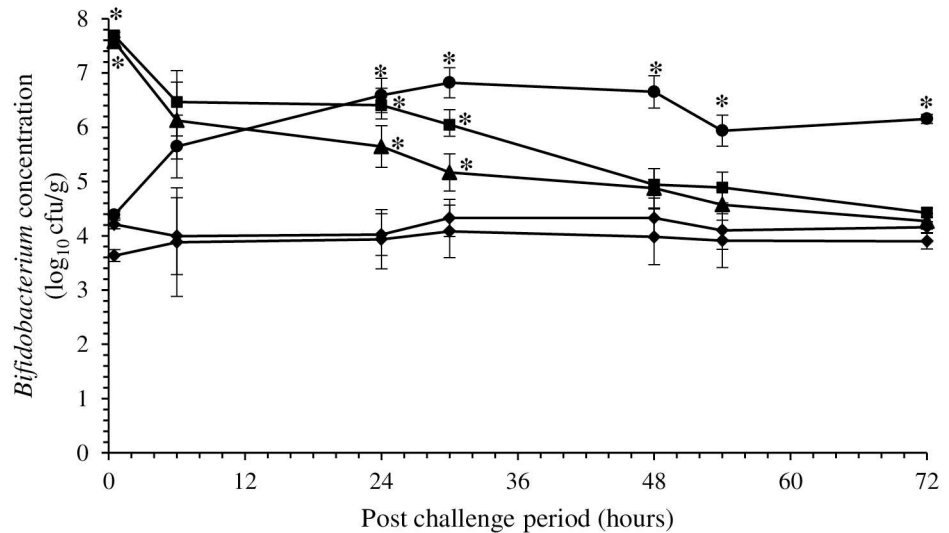

**Fig 3. *Bifidobacterium* viable counts over a 72 h period in the intestinal contents of suckling CD-1 mice: not fed strain RBL67 (group A, ◆), fed strain RBL67 (group B, ▲), not fed strain RBL67, challenged with rotavirus SA-11 (group C, ×), fed strain RBL67 before challenge (group D, ■), fed strain RBL67 after challenge (group E, ●)** (See Table 1 for details) *Bifidobacterium* counts were determined by plating. Error bars indicate the standard error of the mean. An asterisk indicates significant difference compared to ◆ (Hsu-Dunnnett test,  $P < 0.05$ ,  $n = 3$ ).

doi:10.1371/journal.pone.0164512.g003

### Intestinal concentration of *Bifidobacterium* strain RBL67 was not influenced by rotavirus infection

The protective effect of *B. thermophilum* RBL67 observed *in vitro* was evaluated in suckling CD-1 mice distributed to five experimental groups (A to E, Table 1). Viable counts of *Bifidobacterium* in the intestinal contents were monitored for 72 h (Fig 3). In control mice (group A), bifidobacteria were detected at about 3.8 log<sub>10</sub> cfu/g, which remained stable throughout the experiment. Similar results ( $P > 0.05$ ) were obtained with mice challenged with rotavirus (group C). In mice fed *B. thermophilum* RBL67 then challenged with rotavirus (group D), *Bifidobacterium* counts gradually decreased from 7.5 to 4.2 log<sub>10</sub> cfu/g and were no longer significantly different from control mice after 48 h. In contrast, counts increased from 4.2 to 6.6 log<sub>10</sub> cfu/g in mice that received *B. thermophilum* RBL67 for 7 days after challenge (group E) and were significantly higher than in control mice starting at 24 h.

### *Bifidobacterium* strain RBL67 fed prior to challenge reduced diarrhea duration

Control mice (group A) did not develop diarrhea at any point. Mice challenged with the simian rotavirus strain SA-11 without receiving *B. thermophilum* RBL67 (group C) suffered from diarrhea beginning at 24–30 h post challenge and most intensely at 54 h. Reduced activity was observed during the 7 days post challenge. In contrast, mice that received *B. thermophilum* RBL67 for 7 days prior to challenge (group D) suffered from diarrhea later (starting at 48 h) and recovered earlier than did group C mice. The post challenge feeding with *B. thermophilum* RBL67 (group E) also delayed the onset of diarrhea slightly (30 h) without accelerating recovery. Body weight was significantly lower in groups C, D and E during the first 72 h post challenge (S2 Fig).



## Pre-challenge feeding with *B. thermophilum* RBL67 limited intestinal replication of rotavirus

The course of rotavirus infection in suckling CD-1 mice was observed for 72 h by measuring strain SA-11 titer in the intestinal contents using ELISA (Fig 4). No rotavirus was detected in control mice (group A) or mice fed *B. thermophilum* RBL67 (group B). In mice not fed *B. thermophilum* RBL67 but challenged with strain SA-11 (group C), the titer increased from 2.9 log<sub>10</sub> initially, peaked to 5.2 log<sub>10</sub> after 24 h and decreased at 4.2 log<sub>10</sub> after 30 h, as described previously [49]. In mice that received *B. thermophilum* RBL67 for 7 days after challenge (group E), a 30 h delay in the increase from the initial titer (3.5 log<sub>10</sub>) was noted. The titer then rose to 4.4 log<sub>10</sub> at 72 h. Pre-challenge feeding with *B. thermophilum* RBL67 (group D) appeared to control the infection, limiting the rotavirus titer to between 3.2 and 2.5 log<sub>10</sub> (significantly lower than in the other groups) for 72 h.

## Pre-challenge feeding with *B. thermophilum* RBL67 limited intestinal lesions

Inflammatory histopathology as revealed by hematoxylin and eosin stains of sections of colon from non-infected CD-1 suckling mice (groups A and B) and those challenged with simian rotavirus strain SA-11 with or without *B. thermophilum* RBL67 treatment (groups C, D and E) are shown in Fig 5. Colons of group B mice appeared similar to those of control mice (group A). Histological damage was observed in infected mice (group C) beginning 48 h post challenge as was accumulation of fluid in the intestine and dilated colon at necropsy, as described previously [49]. Post-challenge feeding with *B. thermophilum* RBL67 (group E) postponed the onset of visible lesions to 54 h. Group D mice showed less epithelial destruction at 6 h and 48 h, and restoration of normal colonic epithelial architecture by 54 h.

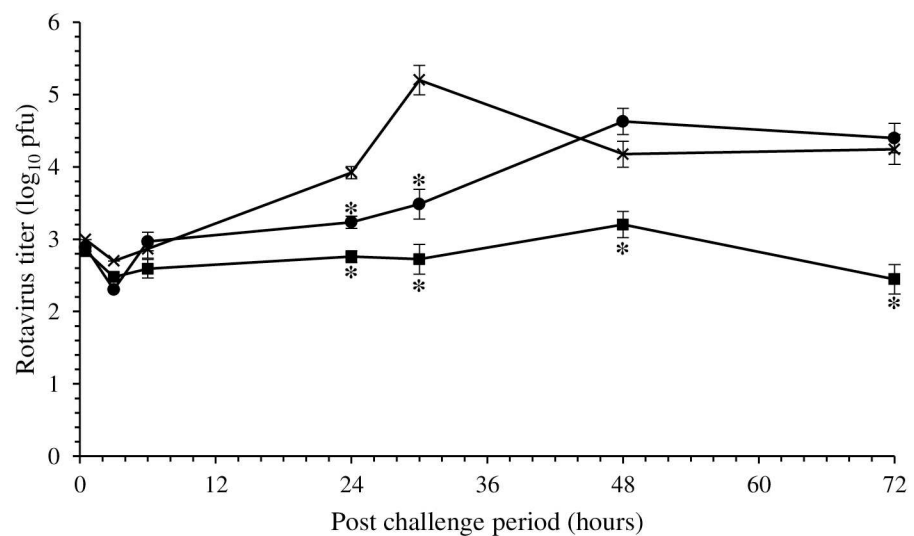

**Fig 4. Simian rotavirus strain SA-11 titer measured in the intestinal contents of suckling CD-1 mice: challenged with the virus (group C, ×), fed *Bifidobacterium* strain RBL67 before challenge (group D, ■), fed strain RBL67 after challenge (group E, ●).** Rotavirus titer was determined by plaque assay. Error bars indicate the standard error of the mean. An asterisk indicates statistical significance compared to × (Hsu-Dunnnett test,  $P < 0.05$ ,  $n = 3$ ).

doi:10.1371/journal.pone.0164512.g004

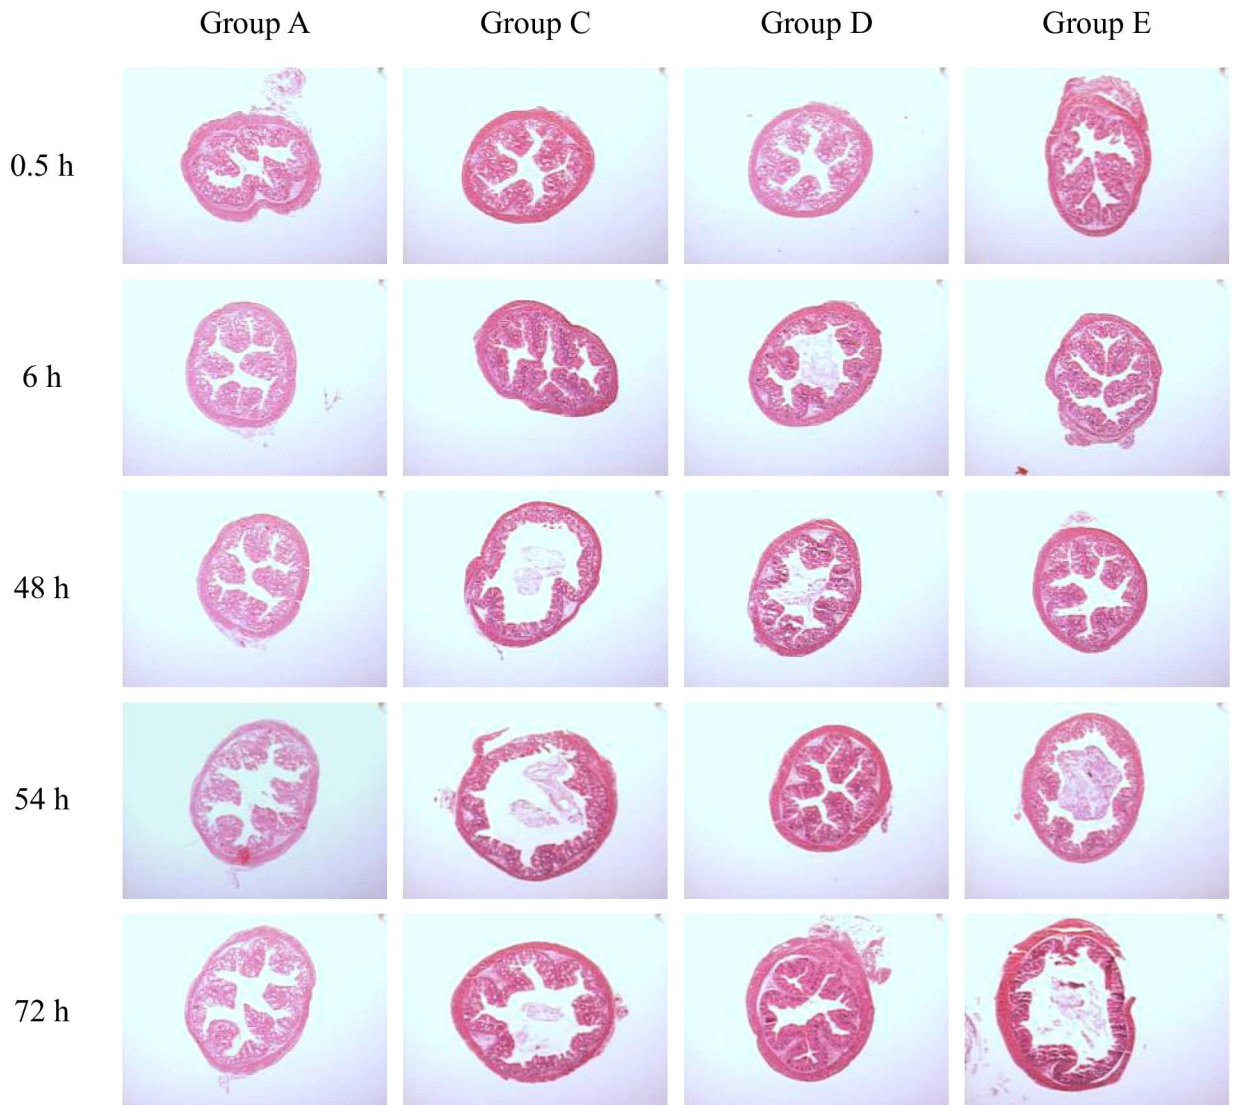

**Fig 5. Hematoxylin and eosin stains of cross-sections of colons from suckling CD-1 mice following challenge with simian rotavirus strain SA-11. Group A: not fed strain RBL67, Group C: not fed strain RBL67, challenged with rotavirus SA-11, Group D: fed strain RBL67 before challenge, Group E: fed strain RBL67 after challenge.** All images were obtained using the same camera setting and are shown at a magnification of 40X.

doi:10.1371/journal.pone.0164512.g005

### Ingested *Bifidobacterium* strain RBL67 stimulated the humoral immune response in suckling mice

The influence of *B. thermophilum* RBL67 on the immune response in suckling CD-1 mice was evaluated by measuring rotavirus-specific IgA in intestinal contents and IgG and IgM in serum (Fig 6). These immunoglobulins were undetectable in mice not challenged with the virus (groups A and B). Four days after challenge with rotavirus (group C), IgA reached 1 OD unit and remained stable until day 7. Ingestion of *B. thermophilum* RBL67 (group D) did not change this level significantly. Among group C mice, IgG and IgM reached 2.0 OD on day 7 and rose to 2.4 OD on day 14, and were even higher (2.9 OD) among group D mice (fed *B. thermophilum* RBL67 for 1 week prior to challenge) from days 7 through 14. Post-challenge feeding (group E) led to the highest level measured for IgG and IgM (3.7 OD), but not until day 14.

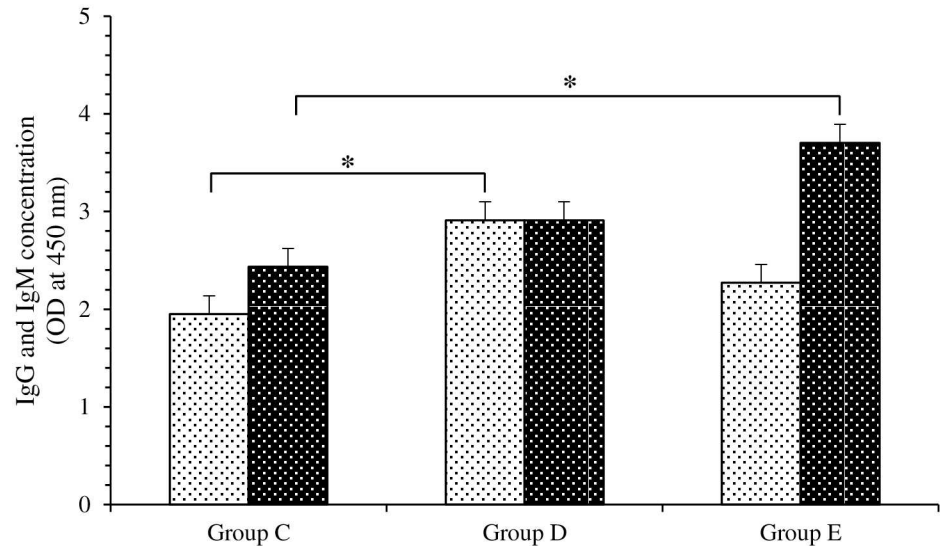

**Fig 6. Immunoglobulin G and M production measured (by ELISA) in serum of mice 7 days (light shade) and 14 days (dark shade) after challenge with simian rotavirus strain SA-11. Group C: not fed strain RBL67, challenged with rotavirus SA-11, Group D: fed strain RBL67 before challenge, Group E: fed strain RBL67 after challenge.** Error bars indicate the standard error of the mean. An asterisk indicates significantly different from group C (Hsu-Dunnett test,  $P < 0.05$ ,  $n = 3$ ).

doi:10.1371/journal.pone.0164512.g006

## Discussion

Despite the effectiveness of vaccines against rotavirus, interest in alternative therapies such as probiotics remains keen, due particularly to the high cost of the vaccine and the lack of rotavirus vaccination programs in many developing countries [34, 50, 51]. In the present study, the ability of the probiotic candidate *B. thermophilum* RBL67 to inhibit rotavirus infection was assessed *in vitro* using intestinal cell lines and then *in vivo* using suckling mice.

Prior to *in vivo* study, the probiotic candidate should be screened for safety, resistance to gastric acidity and bile acid, adherence to human epithelial cells, and ability to reduce pathogen adhesion [19]. The long history of consumption of fermented milk and the growing body of knowledge on bifidobacteria taxonomy and physiology support the safety of the proposed use of bacteria such as *B. thermophilum* RBL67 [52]. This strain has been shown resistant to acidity [32] and should be resistant to bile since it possesses bile salt hydrolase [40]. We evaluated its adhesiveness (Fig 1) to two intestinal cell lines that present different functional characteristics, namely Caco-2 and HT-29 [53]. Its adhesion index on Caco-2 cells is similar to that of *B. animalis* subsp. *lactis* Bb12 [54] and *B. pseudolongum* ATCC 25526, which are considered highly adhesive [48]. The adhesion index of *B. thermophilum* RBL67 was also higher than that of *Lb. rhamnosus* GG (the most studied probiotic), estimated at 145 [55]. This ability might be associated in part with the presence of enolase and transaldolase genes, revealed by sequencing of the *B. thermophilum* RBL67 genome [40], which are involved in interaction processes with the host [56, 57].

An *in vitro* assay carried out to evaluate to what extent *B. thermophilum* RBL67 interfered with rotavirus attachment to intestinal cell lines revealed that this strain excludes rotavirus competitively. Among the three strategies tested, exclusion (contact with the cells for 30 min prior to challenge with the virus) and competition led to the greatest reductions in rotavirus attachment (Fig 2). The exclusion scenario simulates the presence of the probiotic in the intestinal lumen due to ingestion of bacteria as a supplement before infection. Rotavirus attachment

was reduced by  $2.0 \pm 0.1 \log_{10}$  and  $1.5 \pm 0.1 \log_{10}$  in exclusion and competition assays respectively. To our knowledge, no such reduction has been reported previously in the literature. Reductions in the range of 9.0–49.8% (i.e. less than  $1 \log_{10}$ ) have been observed previously for human rotavirus Wa attachment to MA-104 and HT-29 cells in the presence of 6 *Bifidobacterium* strains, whether in exclusion or competition assays [58], and in the range of 3.3–38% for attachment to Vero cells in the presence of 5 *Bifidobacterium* or 6 *Lactobacillus* strains [59]. In the present study, the third assay (displacement) simulating post-infection feeding led to negligible reduction of rotavirus attachment ( $0.2 \pm 0.1 \log_{10}$ ), possibly explaining the poor health observed in group E mice.

Based on these results, an *in vivo* study was performed using suckling mice to evaluate the host-protective properties of *B. thermophilum* RBL67 and to determine whether or not daily intake could mitigate the risk of rotavirus infection. CD-1 suckling mice were chosen because of their susceptibility to rotavirus (induction of diarrhea and spread of the virus throughout the tissues in a reproducible manner) and they are well characterized, low cost, and easy to handle in large numbers [60, 61]. Ingestion of *B. thermophilum* RBL67 increased significantly the concentration of viable *Bifidobacterium* in the intestine, confirming that this probiotic candidate of fecal origin survived the various digestive stresses. The strain persisted in the intestine only for 2 days after daily consumption ceased (Fig 3). Although *B. thermophilum* RBL67 has been shown to grow in a simulated human juvenile intestinal environment [38], it did not likely persist in the intestinal microbiota of the suckling mice, since an indigenous population of *Bifidobacterium* was already present. Tannock, Munro [62] demonstrated that a stable population of lactobacilli prevented long-term colonization by *Lb. rhamnosus* DR20 ingested as a probiotic. In addition, *B. thermophilum* RBL67 did not induce any obvious adverse or toxic effect in suckling CD-1 mice.

Rotavirus induced diarrhea in unprotected mice (group C) over a period of 3 days, starting at 24–30 h post challenge. The onset of this symptom coincided with the increase of viral titer in the intestinal contents (Fig 4) and the appearance of lesions in the intestinal epithelium (Fig 5). As expected [63, 64], the infection triggered the production of rotavirus-specific intestinal IgA and humoral IgG and IgM. Daily ingestion of *B. thermophilum* RBL67 prior to infection (group D) had a moderate but clear protective effect, decreasing diarrhea and virus replication for at least 3 days. Such delays in the onset of diarrhea have been reported in association with other probiotic candidates such as *B. longum* [59] and *Lb. rhamnosus* GG [65]. In contrast, the published data concerning the control of virus shedding are discordant since this is likely strain-specific. *B. longum* [59], *Lb. rhamnosus* GG [65], *Lb. acidophilus* NCFM and *Lb. reuteri* ATCC 23272 [66] were reported to have no effect, unlike a combination of *Lb. rhamnosus* GG and *B. animalis* subsp. *lactis* Bb12, which controlled virus shedding until 4 days post challenge [67]. A significant initial reduction in rotavirus shedding has been noted following pre-challenge feeding with *B. longum* subsp. *infantis* CECT 7210, but this was not maintained beyond day 2 post challenge [58]. Daily ingestion of *B. thermophilum* RBL67 prior to challenge reduced damage to the intestinal epithelium, which recovered its normal architecture by 54 h post challenge. Some preservation of vacuolated enterocytes has been associated with *Lb. rhamnosus* GG, although normal architecture was still not restored 6 days post challenge [65]. Post-challenge feeding with *B. thermophilum* RBL67 (group E) provided less conclusive results than did pre-challenge feeding (group D), in which the increase in intestinal rotavirus titer and damage to the epithelium were limited to the 30–54 h period before returning to levels observed in control mice (group B). Nevertheless, these effects are similar to those observed with pre-challenge ingestion of *B. longum* subsp. *infantis* CECT 7210 [58].

Several mechanisms have been proposed to explain the efficacy of probiotics in the prevention and treatment of diarrheal diseases. The possible mechanisms include among others

production of acidity, short-chain fatty acids and antimicrobial substances, normalization of perturbed microbiota, increased turnover of enterocytes, competitive exclusion of pathogens, improved barrier function, and stimulation of immune responses to pathogens [20, 68]. The moderate protective effect associated with *B. thermophilum* RBL67 intake could be due partly to competitive exclusion of rotavirus, tight junction strengthening [39] and stimulation of the immune response. Indeed, recovery from infection is correlated primarily with rotavirus-specific antibody production [69]. We found no significant stimulation of IgA in response to ingestion of *B. thermophilum* RBL67. Regarding this immunoglobulin, conflicting results have been reported: some researchers have observed stimulation [70–73] while others did not [58]. However, ingestion of *B. thermophilum* RBL67 was associated with an obvious specific humoral response reflected in IgG and IgM (Fig 6). This was accelerated when *B. thermophilum* RBL67 was already present in the intestinal lumen at the time of challenge compared to when it was ingested post challenge. Others have shown that probiotic candidates *Lb. acidophilus* NCFM and *Lb. reuteri* ATCC 23272 increase total small intestinal IgM and IgG levels in rotavirus-infected gnotobiotic piglets [66]. These results suggest that the immunomodulatory effect of a probiotic is strain-specific [74]. Although IgA is thought to provide the most effective protection against rotavirus in the intestine, evidence suggests that serum IgG or IgM in sufficient quantities can reach the intestinal epithelium and provide additional protection [69, 75–77]. This study does not exclude other modalities of host immune response, in particular the effect on cytokine-secreting cells [78], which should be investigated in a future study.

In summary, the probiotic candidate *Bifidobacterium thermophilum* strain RBL67 reduced the duration of diarrhea, limited epithelial lesions, controlled rotavirus replication in the intestine, stimulated the humoral specific IgG and IgM response, and shortened the time of recovery from symptoms in CD-1 suckling mice. Furthermore, *B. thermophilum* RBL67 displayed high adhesiveness and competitiveness and hence interference with rotavirus attachment to intestinal cells *in vitro*. These functions might contribute to the mechanisms underlying the moderate protective effect of *B. thermophilum* RBL67 against rotavirus in this model of infection. In addition, *B. thermophilum* RBL67 meets several criteria for probiotic bacteria: presumed safety, resistance to gastric acidity and bile acids, adherence to human epithelial cells, ability to reduce virus attachment and to reduce the symptoms of infection in suckling mice, and its genome now fully sequenced for scientific scrutiny. Further studies are required in order to identify the mechanisms underlying the apparent beneficial effects of *B. thermophilum* RBL67 and to confirm our results in a more human-like model (such as piglets) before proceeding with human trials. If these beneficial effects are also observed in human, a prophylaxis use of *B. thermophilum* RBL67 coupled with supplementary or complementary treatment during the winter seasonal peaks of gastroenteritis could be envisaged in children.

## Supporting Information

**S1 Fig. Attachment of human rotavirus strain Wa to intestinal cells: (A) Caco-2, (B) HT-29.** Monolayers were contacted with rotavirus suspended at a titer of  $6.9 \log_{10}$  ffu/mL and attachment was measured directly by immunofluorescence assay. Error bars indicate the standard error of the mean. Different letters indicate significant difference between assay times (Tukey's HSD test,  $P < 0.05$ ,  $n = 3$ ). (DOCX)

**S2 Fig. Average body weight of CD-1 suckling mice during 7 days after challenge with rotavirus SA-11: not fed strain RBL67 (group A, ◆), fed strain RBL67 (group B, ▲), not fed strain RBL67, challenged with rotavirus SA-11 (group C, ×), fed strain RBL67 before challenge (group D, ■), fed strain RBL67 after challenge (group E, ●)** (See Table 1 for details).

Error bars indicate the standard error of the mean. An asterisk indicates statistical significance compared to ♦ (Tukey's HSD test,  $P < 0.05$ ,  $n = 189$ ). (DOCX)

**S1 File. Data.**  
(PDF)

## Acknowledgments

We thank Irena Kukavica-Ibrulj, Ueli Von Ah, Mélanie Pelletier, Julie Brassard and Brigitte Dubé for their skilled technical assistance and Sylvie Roy for the histological preparations.

## Author Contributions

**Conceptualization:** AD IF JJ.

**Data curation:** MG AV.

**Formal analysis:** MG AV.

**Funding acquisition:** JJ.

**Investigation:** MG.

**Methodology:** MG AD IF JJ.

**Project administration:** AD IF JJ.

**Resources:** AD IF JJ.

**Software:** SB CE HA YZL.

**Supervision:** YZL.

**Validation:** MG AV AD IF JJ.

**Visualization:** MG AV.

**Writing – original draft:** MG AV.

**Writing – review & editing:** MG AV JJ.

## References

1. Bilcke J, Van Damme P, Van Ranst M, Hens N, Aerts M, Beutels P. Estimating the incidence of symptomatic rotavirus infections: A systematic review and meta-analysis. *PLoS ONE*. 2009; 4(6):e6060. doi: [10.1371/journal.pone.0006060](https://doi.org/10.1371/journal.pone.0006060) PMID: [19557133](https://pubmed.ncbi.nlm.nih.gov/19557133/)
2. Lanata CF, Fischer-Walker CL, Olascoaga AC, Torres CX, Aryee MJ, Black RE. Global causes of diarrheal disease mortality in children < 5 years of age: A systematic review. *PLoS ONE*. 2013; 8(9): e72788. doi: [10.1371/journal.pone.0072788](https://doi.org/10.1371/journal.pone.0072788) PMID: [24023773](https://pubmed.ncbi.nlm.nih.gov/24023773/)
3. World Health Organisation. Rotavirus vaccines. WHO position paper—January 2013. <http://www.who.int/wer/2013/wer8805.pdf>. *Weekly Epidemiological Record*. 2013;88th year(5):49–64.
4. Estes M, Greenberg HB. Rotaviruses. In: Knipe D, Howley P, editors. *Fields Virology*. Volume 1. 6th ed. Philadelphia, PA, USA: Wolters Kluwer Health/Lippincott Williams & Wilkins; 2013. p. 1347–401.
5. Graham DY, Dufour GR, Estes M. Minimal infective dose of rotavirus. *Archives of Virology*. 1987; 92(3–4):261–71. doi: [10.1007/BF01317483](https://doi.org/10.1007/BF01317483) PMID: [3028333](https://pubmed.ncbi.nlm.nih.gov/3028333/)
6. Ansari SA, Sattar SA, Springthorpe VS, Wells GA, Tostowaryk W. Rotavirus survival on human hands and transfer of infectious virus to animate and nonporous inanimate surfaces. *Journal of Clinical Microbiology*. 1988; 26(8):1513–8. PMID: [2844846](https://pubmed.ncbi.nlm.nih.gov/2844846/)

7. Sattar SA, Lloyd-Evans N, Springthorpe VS, Nair RC. Institutional outbreaks of rotavirus diarrhoea: Potential role of fomites and environmental surfaces as vehicles for virus transmission. *Epidemiology & Infection*. 1986; 96(02):277–89. doi: [10.1017/S0022172400066055](https://doi.org/10.1017/S0022172400066055) PMID: [3701042](https://pubmed.ncbi.nlm.nih.gov/3701042/)
8. King AMQ, Adams MJ, Lefkowitz EJ. Family: Reoviridae. In: King AMQ, Adams MJ, Carstens EB, Lefkowitz EJ, editors. *International Committee on Taxonomy of Viruses: Ninth Report of the International Committee on Taxonomy of Viruses, International Union of Microbiological Societies*. Volume 9. San Diego, CA, USA: Elsevier; 2011. p. 541–637.
9. Arias CF, Silva-Ayala D, López S. Rotavirus entry: A deep journey into the cell with several exits. *Journal of Virology*. 2015; 89(2):890–3. doi: [10.1128/JVI.01787-14](https://doi.org/10.1128/JVI.01787-14) PMID: [25378490](https://pubmed.ncbi.nlm.nih.gov/25378490/)
10. Gavi. Rotavirus vaccine support 2015 [23 september 2015]. Available from: <http://www.gavi.org/support/nvs/rotavirus/>.
11. Clarke E, Desselberger U. Correlates of protection against human rotavirus disease and the factors influencing protection in low-income settings. *Mucosal Immunol*. 2015; 8(1):1–17. doi: [10.1038/mi.2014.114](https://doi.org/10.1038/mi.2014.114) PMID: [25465100](https://pubmed.ncbi.nlm.nih.gov/25465100/)
12. Atchison CJ, Stowe J, Andrews N, Collins S, Allen DJ, Nawaz S, et al. Rapid declines in age group-specific rotavirus infection and acute gastroenteritis among vaccinated and unvaccinated individuals within 1 year of rotavirus vaccine introduction in England and Wales. *Journal of Infectious Diseases*. 2016; 213(2):243–9. doi: [10.1093/infdis/jiv398](https://doi.org/10.1093/infdis/jiv398) PMID: [26232438](https://pubmed.ncbi.nlm.nih.gov/26232438/)
13. Robinson CM, Pfeiffer JK. Viruses and the microbiota. *Annual review of virology*. 2014; 1:55–69. doi: [10.1146/annurev-virology-031413-085550](https://doi.org/10.1146/annurev-virology-031413-085550). PMC4373533. PMID: [25821837](https://pubmed.ncbi.nlm.nih.gov/25821837/)
14. Pfeiffer JK, Virgin HW. Transkingdom control of viral infection and immunity in the mammalian intestine. *Science*. 2016; 351(6270):aad5872. doi: [10.1126/science.aad5872](https://doi.org/10.1126/science.aad5872) PMID: [26816384](https://pubmed.ncbi.nlm.nih.gov/26816384/)
15. Jones MK, Watanabe M, Zhu S, Graves CL, Keyes LR, Grau KR, et al. Enteric bacteria promote human and mouse norovirus infection of B cells. *Science*. 2014; 346(6210):755–9. doi: [10.1126/science.1257147](https://doi.org/10.1126/science.1257147) PMID: [25378626](https://pubmed.ncbi.nlm.nih.gov/25378626/)
16. Uchiyama R, Chassaing B, Zhang B, Gewirtz AT. Antibiotic treatment suppresses rotavirus infection and enhances specific humoral immunity. *Journal of Infectious Diseases*. 2014. doi: [10.1093/infdis/jiu037](https://doi.org/10.1093/infdis/jiu037) PMID: [24436449](https://pubmed.ncbi.nlm.nih.gov/24436449/)
17. Allen SJ, Martinez EG, Gregorio GV, Dans LF. Probiotics for treating acute infectious diarrhoea. *Cochrane Database Systematic Reviews* 2010;(11: ). doi: [10.1002/14651858.CD003048.pub3](https://doi.org/10.1002/14651858.CD003048.pub3)
18. Mrukowicz J, Szajewska H, Vesikari T. Options for the prevention of rotavirus disease other than vaccination. *Journal of Pediatric Gastroenterology and Nutrition*. 2008; 46:S32–S7. doi: [10.1097/MPG.0b013e31816f79b0](https://doi.org/10.1097/MPG.0b013e31816f79b0). 00005176-200805002-00005. PMID: [18460970](https://pubmed.ncbi.nlm.nih.gov/18460970/)
19. Food and Agricultural Organization of the United Nations, World Health Organization. Joint FAO/WHO working group report on drafting guidelines for the evaluation of probiotics in food. Food and Agricultural Organization of the United Nations [online]. <ftp://ftp.fao.org/esn/food/wgreport2pdf2002>.
20. Hill C, Guarner F, Reid G, Gibson GR, Merenstein DJ, Pot B, et al. Expert consensus document: The International Scientific Association for Probiotics and Prebiotics consensus statement on the scope and appropriate use of the term probiotic. *Nature Reviews Gastroenterology & Hepatology*. 2014; 11(8):506–14. doi: [10.1038/nrgastro.2014.66](https://doi.org/10.1038/nrgastro.2014.66) PMID: [24912386](https://pubmed.ncbi.nlm.nih.gov/24912386/)
21. Gagnon M, Zihler A, Chassard C, Lacroix C. Ecology of probiotics and enteric protection. In: Malago JJ, K J, Marinsek-Logar R., editor. *Probiotic Bacteria and Enteric Infections—Cytoprotection by probiotic bacteria*. Volume 1. New York, NY, USA: Springer Science+Business Media B.V.; 2011. p. 65–85. doi: [10.1039/c5fo01581b](https://doi.org/10.1039/c5fo01581b)
22. Gareau MG, Sherman PM, Walker WA. Probiotics and the gut microbiota in intestinal health and disease. *Nature Reviews Gastroenterology & Hepatology*. 2010; 7(9):503–14. doi: [10.1038/nrgastro.2010.117](https://doi.org/10.1038/nrgastro.2010.117) PMID: [20664519](https://pubmed.ncbi.nlm.nih.gov/20664519/)
23. Freitas M, Tavan E, Cayuela C, Diop L, Sapin C, Trugnan G. Host-pathogens cross-talk. Indigenous bacteria and probiotics also play the game. *Biology of the Cell*. 2003; 95(8):503–6. PMID: [14630386](https://pubmed.ncbi.nlm.nih.gov/14630386/)
24. Haschke F, Wang W, Ping G, Varavithya W, Podhipak A, Rochat F, et al. Clinical trials prove the safety and efficacy of the probiotic strain *Bifidobacterium* Bb12 in follow-up formula and growing-up milks. *Monatsschr Kinderheilkd*. 1998; 146(1):S26–S30. doi: [10.1007/PL00014763](https://doi.org/10.1007/PL00014763)
25. Szajewska H, Skórka A, Ruszczyński M, Gieruszczak-Białek D. Meta-analysis: *Lactobacillus* GG for treating acute gastroenteritis in children—updated analysis of randomised controlled trials. *Alimentary Pharmacology & Therapeutics*. 2013; 38(5):467–76. doi: [10.1111/apt.12403](https://doi.org/10.1111/apt.12403) PMID: [23841880](https://pubmed.ncbi.nlm.nih.gov/23841880/)
26. Guandalini S, Pensabene L, Zikri MA, Dias JA, Casali LG, Hoekstra H, et al. *Lactobacillus* GG administered in oral rehydration solution to children with acute diarrhea: a multicenter European trial. *Journal of Pediatric Gastroenterology and Nutrition*. 2000; 30(1):54–60. PMID: [10630440](https://pubmed.ncbi.nlm.nih.gov/10630440/)

27. Sarker SA, Sultana S, Fuchs GJ, Alam NH, Azim T, Brüssow H, et al. *Lactobacillus paracasei* strain ST11 has no effect on rotavirus but ameliorates the outcome of nonrotavirus diarrhea in children from Bangladesh. *Pediatrics*. 2005; 116(2):e221–e8. doi: [10.1542/peds.2004-2334](https://doi.org/10.1542/peds.2004-2334) PMID: [15995003](https://pubmed.ncbi.nlm.nih.gov/15995003/)
28. Saavedra JM, Bauman NA, Perman JA, Yolken RH, Saavedra JM, Bauman NA, et al. Feeding of *Bifidobacterium bifidum* and *Streptococcus thermophilus* to infants in hospital for prevention of diarrhoea and shedding of rotavirus. *The Lancet*. 1994; 344(8929):1046–9. doi: [10.1016/S0140-6736\(94\)91708-6](https://doi.org/10.1016/S0140-6736(94)91708-6) PMID: [7934445](https://pubmed.ncbi.nlm.nih.gov/7934445/)
29. Kandasamy S, Vlasova AN, Fischer D, Kumar A, Chattha KS, Rauf A, et al. Differential effects of *Escherichia coli* Nissle and *Lactobacillus rhamnosus* strain GG on human rotavirus binding, infection, and B cell immunity. *The Journal of Immunology*. 2016. doi: [10.4049/jimmunol.1501705](https://doi.org/10.4049/jimmunol.1501705) PMID: [26800875](https://pubmed.ncbi.nlm.nih.gov/26800875/)
30. Grandy G, Medina M, Soria R, Teran C, Araya M. Probiotics in the treatment of acute rotavirus diarrhoea. A randomized, double-blind, controlled trial using two different probiotic preparations in Bolivian children. *BMC Infectious Diseases*. 2010; 10(1):253. doi: [10.1186/1471-2334-10-253](https://doi.org/10.1186/1471-2334-10-253) PMID: [20735858](https://pubmed.ncbi.nlm.nih.gov/20735858/)
31. Touré R, Kheadr E, Lacroix C, Moroni O, Fliss I. Production of antibacterial substances by bifidobacterial isolates from infant stool active against *Listeria monocytogenes*. *Journal of Applied Microbiology*. 2003; 95(5):1058–69. doi: [10.1046/j.1365-2672.2003.02085.x](https://doi.org/10.1046/j.1365-2672.2003.02085.x) PMID: [14633035](https://pubmed.ncbi.nlm.nih.gov/14633035/)
32. von Ah U, Mozzetti V, Lacroix C, Kheadr EE, Fliss I, Meile L. Classification of a moderately oxygen-tolerant isolate from baby faeces as *Bifidobacterium thermophilum*. *BMC microbiology*. 2007; 7(1):79. doi: [10.1186/1471-2180-7-79](https://doi.org/10.1186/1471-2180-7-79) PMID: [17711586](https://pubmed.ncbi.nlm.nih.gov/17711586/)
33. Wold AE, Adlerberth I. Breast feeding and the intestinal microflora of the infant—implications for protection against infectious diseases. In: Koletzko B, Michaelsen K, Hernell O, editors. *Short and Long Term Effects of Breast Feeding on Child Health*. Advances in Experimental Medicine and Biology. 478: Springer US; 2002. p. 77–93. doi: [10.1007/0-306-46830-1\\_7](https://doi.org/10.1007/0-306-46830-1_7) PMID: [11065062](https://pubmed.ncbi.nlm.nih.gov/11065062/)
34. Di Gioia D, Aloisio I, Mazzola G, Biavati B. Bifidobacteria: their impact on gut microbiota composition and their applications as probiotics in infants. *Applied Microbiology and Biotechnology*. 2014; 98(2):563–77. doi: [10.1007/s00253-013-5405-9](https://doi.org/10.1007/s00253-013-5405-9) PMID: [24287935](https://pubmed.ncbi.nlm.nih.gov/24287935/)
35. Bottacini F, Ventura M, van Sinderen D, Motherway MOC. Diversity, ecology and intestinal function of bifidobacteria. *Microbial Cell Factories*. 2014; 13(Suppl 1):S4. doi: [10.1186/1475-2859-13-S1-S4](https://doi.org/10.1186/1475-2859-13-S1-S4) PMID: [25186128](https://pubmed.ncbi.nlm.nih.gov/25186128/)
36. Kheadr E, Bernoussi N, Lacroix C, Fliss I. Comparison of the sensitivity of commercial strains and infant isolates of bifidobacteria to antibiotics and bacteriocins. *International Dairy Journal*. 2004; 14(12):1041–53. doi: [10.1016/j.idairyj.2004.04.010](https://doi.org/10.1016/j.idairyj.2004.04.010)
37. von Ah U. Identification of *Bifidobacterium thermophilum* RBL67 isolated from baby faeces and partial purification of its bacteriocin—PhD thesis. Diss Nr 16927. Zürich, Switzerland 2006.
38. Zihler A, Blay G, Chassard C, Braegger C, Lacroix C. *Bifidobacterium thermophilum* RBL67 inhibits *Salmonella enterica* Serovar Typhimurium in an *in vitro* intestinal fermentation model. *Journal of Food & Nutritional Disorders*. 2014; S1-003. doi: [10.4172/2324-9323.S1-003](https://doi.org/10.4172/2324-9323.S1-003)
39. Zihler A, Gagnon M, Chassard C, Lacroix C. Protective effect of probiotics on *Salmonella* infectivity assessed with combined *in vitro* gut fermentation-cellular models. *BMC Microbiology*. 2011; 11(1):1–13. doi: [10.1186/1471-2180-11-264](https://doi.org/10.1186/1471-2180-11-264) PMID: [22171685](https://pubmed.ncbi.nlm.nih.gov/22171685/)
40. Jans C, Lacroix C, Follador R, Stevens MJ. Complete genome sequence of the probiotic *Bifidobacterium thermophilum* strain RBL67. *Genome announcements*. 2013; 1(3):e00191–13. doi: [10.1128/genomeA.00191-13](https://doi.org/10.1128/genomeA.00191-13) PMID: [23640377](https://pubmed.ncbi.nlm.nih.gov/23640377/)
41. Gagnon M, Kheadr EE, Le Blay G, Fliss I. *In vitro* inhibition of *Escherichia coli* O157:H7 by bifidobacterial strains of human origin. *International Journal of Food Microbiology*. 2004; 92(1):69–78. doi: [10.1016/j.ijfoodmicro.2003.07.010](https://doi.org/10.1016/j.ijfoodmicro.2003.07.010) PMID: [15033269](https://pubmed.ncbi.nlm.nih.gov/15033269/)
42. Beerens H. An elective and selective isolation medium for *Bifidobacterium* spp. *Letters in Applied Microbiology*. 1990; 11(3):155–7. doi: [10.1111/j.1472-765X.1990.tb00148.x](https://doi.org/10.1111/j.1472-765X.1990.tb00148.x)
43. Jean J, Blais B, Darveau A. Rapid detection of human rotavirus using colorimetric nucleic acid sequence-based amplification (NASBA)—enzyme-linked immunosorbent assay in sewage treatment effluent. *FEMS microbiology letters*. 2002; 210(1):143–7. PMID: [12023091](https://pubmed.ncbi.nlm.nih.gov/12023091/)
44. Ramia S, Sattar SA. Simian rotavirus SA-11 plaque formation in the presence of trypsin. *Journal of Clinical Microbiology*. 1979; 10(5):609–14. PMID: [94597](https://pubmed.ncbi.nlm.nih.gov/94597/)
45. Canadian Council on Animal Care. *Guide to the Care and Use of Experimental Animals*. 2nd ed. Olfert ED C B, McWilliam AA, editor. Ottawa, ON, Canada: CCAC Press; 1993. 1–232 p.
46. Gagnon M, Kheadr EE, Dabour N, Richard D, Fliss I. Effect of *Bifidobacterium thermophilum* probiotic feeding on enterohemorrhagic *Escherichia coli* O157:H7 infection in BALB/c mice. *International*



- Journal of Food Microbiology. 2006; 111(1):26–33. doi: [10.1016/j.ijfoodmicro.2006.04.041](https://doi.org/10.1016/j.ijfoodmicro.2006.04.041) PMID: [16822570](https://pubmed.ncbi.nlm.nih.gov/16822570/)
47. Shu Q, Gill HS. A dietary probiotic (*Bifidobacterium lactis* HN019) reduces the severity of *Escherichia coli*/O157:H7 infection in mice. *Medical microbiology and immunology*. 2001; 189(3):147–52. PMID: [11388612](https://pubmed.ncbi.nlm.nih.gov/11388612/)
  48. Crociani J, Grill JP, Huppert M, Ballongue J. Adhesion of different bifidobacteria strains to human enterocyte-like Caco-2 cells and comparison with *in vivo* study. *Letters in Applied Microbiology*. 1995; 21(3):146–8. doi: [10.1111/j.1472-765X.1995.tb01027.x](https://doi.org/10.1111/j.1472-765X.1995.tb01027.x) PMID: [7576496](https://pubmed.ncbi.nlm.nih.gov/7576496/)
  49. Boshuizen JA, Reimerink JHJ, Korteland-van Male AM, van Ham VJJ, Koopmans MPG, Büller HA, et al. Changes in small intestinal homeostasis, morphology, and gene expression during rotavirus infection of infant mice. *Journal of Virology*. 2003; 77(24):13005–16. doi: [10.1128/jvi.77.24.13005-13016.2003](https://doi.org/10.1128/jvi.77.24.13005-13016.2003) PMID: [14645557](https://pubmed.ncbi.nlm.nih.gov/14645557/)
  50. Colbère-Garapin F, Martin-Latil S, Blondel B, Mousson L, Pelletier I, Autret A, et al. Prevention and treatment of enteric viral infections: possible benefits of probiotic bacteria. *Microbes and Infection*. 2007; 9(14):1623–31. doi: [10.1016/j.micinf.2007.09.016](https://doi.org/10.1016/j.micinf.2007.09.016) PMID: [18023231](https://pubmed.ncbi.nlm.nih.gov/18023231/)
  51. Picard C, Fioramonti J, Francois A, Robinson T, Neant F, Matuchansky C. Review article: Bifidobacteria as probiotic agents—physiological effects and clinical benefits. *Alimentary Pharmacology & Therapeutics*. 2005; 22(6):495–512. doi: [10.1111/j.1365-2036.2005.02615.x](https://doi.org/10.1111/j.1365-2036.2005.02615.x) PMID: [16167966](https://pubmed.ncbi.nlm.nih.gov/16167966/)
  52. Russell DA, Ross RP, Fitzgerald GF, Stanton C. Metabolic activities and probiotic potential of bifidobacteria. *International Journal of Food Microbiology*. 2011; 149(1):88–105. doi: [10.1016/j.ijfoodmicro.2011.06.003](https://doi.org/10.1016/j.ijfoodmicro.2011.06.003) PMID: [21763022](https://pubmed.ncbi.nlm.nih.gov/21763022/)
  53. Gagnon M, Zihler Berner A, Chervet N, Chassard C, Lacroix C. Comparison of the Caco-2, HT-29 and the mucus-secreting HT29-MTX intestinal cell models to investigate *Salmonella* adhesion and invasion. *Journal of Microbiological Methods*. 2013; 94(3):274–9. doi: [10.1016/j.mimet.2013.06.027](https://doi.org/10.1016/j.mimet.2013.06.027) PMID: [23835135](https://pubmed.ncbi.nlm.nih.gov/23835135/)
  54. Serafini F, Strati F, Ruas-Madiedo P, Turrone F, Foroni E, Duranti S, et al. Evaluation of adhesion properties and antibacterial activities of the infant gut commensal *Bifidobacterium bifidum* PRL2010. *Anaerobe*. 2013; 21:9–17. doi: [10.1016/j.anaerobe.2013.03.003](https://doi.org/10.1016/j.anaerobe.2013.03.003) PMID: [23523946](https://pubmed.ncbi.nlm.nih.gov/23523946/)
  55. Gopal PK, Prasad J, Smart J, Gill HS. *In vitro* adherence properties of *Lactobacillus rhamnosus* DR20 and *Bifidobacterium lactis* DR10 strains and their antagonistic activity against an enterotoxigenic *Escherichia coli*. *International Journal of Food Microbiology*. 2001; 67(3):207–16. doi: [10.1016/S0168-1605\(01\)00440-8](https://doi.org/10.1016/S0168-1605(01)00440-8) PMID: [11518430](https://pubmed.ncbi.nlm.nih.gov/11518430/)
  56. Candela M, Biagi E, Centanni M, Turrone S, Vici M, Musiani F, et al. Bifidobacterial enolase, a cell surface receptor for human plasminogen involved in the interaction with the host. *Microbiology*. 2009; 155(10):3294–303. doi: [10.1099/mic.0.028795-0](https://doi.org/10.1099/mic.0.028795-0) PMID: [19574304](https://pubmed.ncbi.nlm.nih.gov/19574304/)
  57. González-Rodríguez I, Sánchez B, Ruiz L, Turrone F, Ventura M, Ruas-Madiedo P, et al. Role of extracellular transaldolase from *Bifidobacterium bifidum* in mucin adhesion and aggregation. *Applied and Environmental Microbiology*. 2012; 78(11):3992–8. doi: [10.1128/aem.08024-11](https://doi.org/10.1128/aem.08024-11) PMID: [22447584](https://pubmed.ncbi.nlm.nih.gov/22447584/)
  58. Moreno Muñoz JA, Chenoll E, Casinos B, Bataller E, Ramón D, Genovés S, et al. Novel probiotic *Bifidobacterium longum* subsp. *infantis* CECT 7210 strain active against rotavirus infections. *Applied and Environmental Microbiology*. 2011; 77(24):8775–83. doi: [10.1128/aem.05548-11](https://doi.org/10.1128/aem.05548-11) PMID: [22003027](https://pubmed.ncbi.nlm.nih.gov/22003027/)
  59. Lee DK, Park JE, Kim MJ, Seo JG, Lee JH, Ha NJ. Probiotic bacteria, *B. longum* and *L. acidophilus* inhibit infection by rotavirus *in vitro* and decrease the duration of diarrhea in pediatric patients. *Clinics and Research in Hepatology and Gastroenterology*. 2015; 39(2):237–44. doi: [10.1016/j.clinre.2014.09.006](https://doi.org/10.1016/j.clinre.2014.09.006) PMID: [25459995](https://pubmed.ncbi.nlm.nih.gov/25459995/)
  60. Offit PA, Clark HF, Kornstein MJ, Plotkin SA. A murine model for oral infection with a primate rotavirus (simian SA11). *Journal of Virology*. 1984; 51(1):233–6. PMID: [6328042](https://pubmed.ncbi.nlm.nih.gov/6328042/)
  61. Burns JW, Krishnaney AA, Vo PT, Rouse RV, Anderson LJ, Greenberg HB. Analyses of homologous rotavirus infection in the mouse model. *Virology*. 1995; 207(1):143–53. doi: [10.1006/viro.1995.1060](https://doi.org/10.1006/viro.1995.1060) PMID: [7871723](https://pubmed.ncbi.nlm.nih.gov/7871723/)
  62. Tannock G, Munro K, Harmsen H, Welling G, Smart J, Gopal P. Analysis of the fecal microflora of human subjects consuming a probiotic product containing *Lactobacillus rhamnosus* DR20. *Applied and environmental microbiology*. 2000; 66(6):2578–88. doi: [10.1128/AEM.66.6.2578-2588.2000](https://doi.org/10.1128/AEM.66.6.2578-2588.2000) PMID: [10831441](https://pubmed.ncbi.nlm.nih.gov/10831441/)
  63. Franco MA, Greenberg HB. Immunity to rotavirus in T cell deficient mice. *Virology*. 1997; 238(2):169–79. doi: [10.1006/viro.1997.8843](https://doi.org/10.1006/viro.1997.8843) PMID: [9400590](https://pubmed.ncbi.nlm.nih.gov/9400590/)
  64. Baumgarth N, Tung J, Herzenberg L. Inherent specificities in natural antibodies: a key to immune defense against pathogen invasion. *Springer Semin Immun*. 2005; 26(4):347–62. doi: [10.1007/s00281-004-0182-2](https://doi.org/10.1007/s00281-004-0182-2) PMID: [15633017](https://pubmed.ncbi.nlm.nih.gov/15633017/)

65. Liu F, Li G, Wen K, Wu S, Zhang Y, Bui T, et al. *Lactobacillus rhamnosus* GG on rotavirus-induced injury of ileal epithelium in gnotobiotic pigs. *Journal of Pediatric Gastroenterology and Nutrition*. 2013; 57(6):750–8. doi: [10.1097/MPG.0b013e3182a356e1](https://doi.org/10.1097/MPG.0b013e3182a356e1) PMID: [24280990](https://pubmed.ncbi.nlm.nih.gov/24280990/)
66. Zhang W, Azevedo MS, Gonzalez AM, Saif LJ, Van Nguyen T, Wen K, et al. Influence of probiotic *Lactobacilli* colonization on neonatal B cell responses in a gnotobiotic pig model of human rotavirus infection and disease. *Veterinary Immunology and Immunopathology*. 2008; 122(1):175–81. doi: [10.1016/j.vetimm.2007.10.003](https://doi.org/10.1016/j.vetimm.2007.10.003) PMID: [18023882](https://pubmed.ncbi.nlm.nih.gov/18023882/)
67. Vlasova AN, Chattha KS, Kandasamy S, Liu Z, Esseili M, Shao L, et al. *Lactobacilli* and *bifidobacteria* promote immune homeostasis by modulating innate immune responses to human rotavirus in neonatal gnotobiotic pigs. *PLoS ONE*. 2013; 8(10):e76962. doi: [10.1371/journal.pone.0076962](https://doi.org/10.1371/journal.pone.0076962) PMID: [24098572](https://pubmed.ncbi.nlm.nih.gov/24098572/)
68. O'Toole PW, Cooney JC. Probiotic bacteria influence the composition and function of the intestinal microbiota. *Interdisciplinary Perspectives on Infectious Diseases*. 2008. doi: [10.1155/2008/175285](https://doi.org/10.1155/2008/175285)
69. Franco MA, Angel J, Greenberg HB. Immunity and correlates of protection for rotavirus vaccines. *Vaccine*. 2006; 24(15):2718–31. doi: [10.1016/j.vaccine.2005.12.048](https://doi.org/10.1016/j.vaccine.2005.12.048) PMID: [16446014](https://pubmed.ncbi.nlm.nih.gov/16446014/)
70. Qiao H, Duffy LC, Griffiths E, Dryja D, Leavens A, Rossman J, et al. Immune responses in rhesus rotavirus-challenged BALB/c mice treated with *bifidobacteria* and prebiotic supplements. *Pediatric Research*. 2002; 51(6):750–5. doi: [10.1203/00006450-200206000-00015](https://doi.org/10.1203/00006450-200206000-00015) PMID: [12032272](https://pubmed.ncbi.nlm.nih.gov/12032272/)
71. Mohan R, Koebnick C, Schildt J, Mueller M, Radke M, Blaut M. Effects of *Bifidobacterium lactis* Bb12 supplementation on body weight, fecal pH, acetate, lactate, calprotectin, and IgA in preterm infants. *Pediatric Research*. 2008; 64(4):418–22. doi: [10.1203/PDR.0b013e318181b7fa](https://doi.org/10.1203/PDR.0b013e318181b7fa) PMID: [18552710](https://pubmed.ncbi.nlm.nih.gov/18552710/)
72. Fukushima Y, Kawata Y, Hara H, Terada A, Mitsuoka T. Effect of a probiotic formula on intestinal immunoglobulin A production in healthy children. *International Journal of Food Microbiology*. 1998; 42(1–2):39–44. doi: [10.1016/S0168-1605\(98\)00056-7](https://doi.org/10.1016/S0168-1605(98)00056-7) PMID: [9706796](https://pubmed.ncbi.nlm.nih.gov/9706796/)
73. Yasui H, Kiyoshima J, Ushijima H. Passive protection against rotavirus-induced diarrhea of mouse pups born to and nursed by dams fed *Bifidobacterium breve* YIT4064. *The Journal of Infectious Diseases*. 1995; 172(2):403–9. doi: [10.2307/30135785](https://doi.org/10.2307/30135785) PMID: [7622883](https://pubmed.ncbi.nlm.nih.gov/7622883/)
74. Ashraf R, Shah NP. Immune system stimulation by probiotic microorganisms. *Critical Reviews in Food Science and Nutrition*. 2013; 54(7):938–56. doi: [10.1080/10408398.2011.619671](https://doi.org/10.1080/10408398.2011.619671) PMID: [24499072](https://pubmed.ncbi.nlm.nih.gov/24499072/)
75. O'Neal CM, Harriman GR, Conner ME. Protection of the villus epithelial cells of the small intestine from rotavirus infection does not require immunoglobulin A. *Journal of Virology*. 2000; 74(9):4102–9. doi: [10.1128/jvi.74.9.4102-4109.2000](https://doi.org/10.1128/jvi.74.9.4102-4109.2000) PMID: [10756022](https://pubmed.ncbi.nlm.nih.gov/10756022/)
76. Istrate C, Hinkula J, Hammarström L, Svensson L. Individuals with selective IgA deficiency resolve rotavirus disease and develop higher antibody titers (IgG, IgG1) than IgA competent individuals. *Journal of Medical Virology*. 2008; 80(3):531–5. doi: [10.1002/jmv.21101](https://doi.org/10.1002/jmv.21101) PMID: [18205219](https://pubmed.ncbi.nlm.nih.gov/18205219/)
77. Cerutti A, Rescigno M. The biology of intestinal immunoglobulin A responses. *Immunity*. 2008; 28(6):740–50. doi: [10.1016/j.immuni.2008.05.001](https://doi.org/10.1016/j.immuni.2008.05.001) PMID: [18549797](https://pubmed.ncbi.nlm.nih.gov/18549797/)
78. Servin AL. Antagonistic activities of *lactobacilli* and *bifidobacteria* against microbial pathogens. *FEMS Microbiology Reviews*. 2004; 28(4):405–40. doi: [10.1016/j.femsre.2004.01.003](https://doi.org/10.1016/j.femsre.2004.01.003) PMID: [15374659](https://pubmed.ncbi.nlm.nih.gov/15374659/)
